# Supplementary material
Source: PubMed Central journal article supplement (PMC7101150)
Supplement: jciinsight-5-134105-s207.pdf [file jciinsight-5-134105-s207.pdf]

Supplemental Table 1: Median and IQR for cell surface markers in perinatal infections.

|               | <b>Baseline</b>      | <b>Standard (12h<br/>PMA/Ionomycin)</b> | <b>Enhanced (18h<br/>PHA/PMA/Ionomycin)</b> |
|---------------|----------------------|-----------------------------------------|---------------------------------------------|
| <b>CD69</b>   | 3.62 (1.03 – 4.45)   | 96.72 (96.62 – 97.95)                   | 98.42 (98.22 – 98.75)                       |
| <b>CD25</b>   | 13.58 (7.05 – 24.11) | 70.41 (55.97 – 81.62)                   | 77.88 (58.57 – 84.3)                        |
| <b>HLA-DR</b> | 4.55 (2.56 – 7.07)   | 30.86 (21.76 – 37.27)                   | 35.76 (31.27 – 43.97)                       |
| <b>PD-1</b>   | 10.26 (6.17 – 13.31) | 20.95 (16.95 – 25.46)                   | 18.35 (15.05 – 26.96)                       |
| <b>TIM-3</b>  | 7.470 (5.08 – 8.85)  | 13.17 (10.36 – 13.66)                   | 8.96 (5.95 – 9.47)                          |
| <b>TIGIT</b>  | 20.37 (15.6 – 22.7)  | 17.77 (12.6 – 19.23)                    | 13.67 (11.1 – 17.93)                        |

**Supplemental Table 2: Median and IQR for cell surface markers in adult infections.**

|               | <b>Baseline</b>       | <b>Standard (12h<br/>PMA/Ionomycin)</b> | <b>Enhanced (18h<br/>PHA/PMA/Ionomycin)</b> |
|---------------|-----------------------|-----------------------------------------|---------------------------------------------|
| <b>CD69</b>   | 5.88 (1.645 – 23.55)  | 92.95 (64.6 – 98.29)                    | 94.1 (85.05 – 98.37)                        |
| <b>CD25</b>   | 12.59 (4.26 – 16.9)   | 66.39 (35.95 – 72.28)                   | 68.24 (42.72 – 76.93)                       |
| <b>HLA-DR</b> | 10.52 (9.068 – 16.99) | 35.87 (21.49 – 60.37)                   | 48.52 (22.01 – 75.39)                       |
| <b>PD-1</b>   | 9.43 (2.47 – 15.1)    | 15.2 (5.4 – 20.83)                      | 14.55 (5.69 – 20.83)                        |
| <b>TIM-3</b>  | 10.61 (7.88 – 14.06)  | 12.41 (9.31 – 15.01)                    | 8.56 (7.35 – 9.32)                          |
| <b>TIGIT</b>  | 15.96 (11.67 – 20.41) | 11.83 (6.34 – 16.04)                    | 9.805 (6.34 – 12.51)                        |

Supplemental Table 3. Primers and Probes used for viral subtypes.

|                        | <b>Tat1.4</b>                   | <b>Rev</b>                                | <b>Tat2</b>                                         | <b>HIVFamzen</b>                                                 |
|------------------------|---------------------------------|-------------------------------------------|-----------------------------------------------------|------------------------------------------------------------------|
| <b>B<sup>1</sup></b>   | TGG CAG<br>GAA GAA<br>GCG GAG A | GGA TCT GTC TCT<br>GTC TCT CTC TCC<br>ACC | ACA GTC AGA CTC<br>ATC AAG TTT CTC<br>TAT CAA AGC A | /56-FAM/TTC CTT CGG<br>/ZEN/GCC TGT CGG GTC CCGTC<br>CC/3IABkFQ/ |
| <b>A/E<sup>2</sup></b> | TGG CAG<br>GAA GAA<br>GCG GAA G | TGT CTC TGY CTT<br>GCT CKC CAC C          | GCA GTA AGG ATC<br>ATC AAA ATC CTA<br>TAC CAG AGC A | /56-FAM/TTC YTT CGG/ZEN/GCC<br>TGT CGG GTT CC/3IABkFQ            |
| <b>A/D</b>             | TGG CAG<br>GAA GAA<br>GCG GAG A | TGG TTC TGY CTT<br>GCT CTC CAC C          | GCA GTC AGG ATC<br>ATC AAA ATC CTA<br>TAC CAA AGC A | /56-<br>FAM/TTCYTCCGG/ZEN/GCCTGTC<br>GAGATCC/3IABkFQ/            |
| <b>A/G</b>             | TGG CAG<br>GAA GAA<br>GCG GAG A | TGT CTC TGY CTT<br>GCT CKC CAC C          | GCC GTC AGG ATC<br>ATC AAA ATC CTG<br>TAC CAA AGC A | /56-FAM/TTC YTT CGG/ZEN/GCC<br>TGT CGG GTT CC/3IABkFQ            |
| <b>A</b>               | TGG CAG<br>GAA GAA<br>GCG GAR R | GAT CTG YCT CTG<br>YCT TGC TCT CCA<br>CC  | GCA GTA AGG ATC<br>ATC AAA ATC CTR<br>TAC CAA AGC A | /56-<br>FAM/TTCTTCCGG/ZEN/GCCTGTC<br>GGGWYCC/3IABkFQ/            |
| <b>C</b>               | TGG CAG<br>GAA GAA<br>GCG GAG A | GAT CTG YCT CTG<br>YCT TGC TCT CCA<br>CC  | GCA GTG AGG ATC<br>ATC AAA ATC YTR<br>TAT CAA AGC A | /56-<br>FAM/TTCYTTCGG/ZEN/GCCTGTC<br>GGGTYCC/3IABkFQ/            |

<sup>1</sup>Procopio FA, Fromentin R, Kulpa DA, et al. A Novel Assay to Measure the Magnitude of the Inducible Viral Reservoir in HIV-infected Individuals. *EBioMedicine* 2015;2:874-83.

<sup>2</sup>Colby DJ, Trautmann L, Pinyakorn S, et al. Rapid HIV RNA rebound after antiretroviral treatment interruption in persons durably suppressed in Fiebig I acute HIV infection. *Nat Med* 2018;24:923-6.

Supplemental Table 4. Antibodies used for flow cytometry.

| <b>Antibodies</b> | <b>Clone</b> | <b>Manufacturer</b>          |
|-------------------|--------------|------------------------------|
| Live/dead FVS780  | N/A          | BD Biosciences, San Jose, CA |
| CD8 BV510         | SK1          | BD Biosciences, San Jose, CA |
| CD14 BV510        | M $\phi$ P9  | BD Biosciences, San Jose, CA |
| CD19 BV510        | SJ25C1       | BD Biosciences, San Jose, CA |
| CD3 APC R700      | UCHT1        | BD Biosciences, San Jose, CA |
| CD4 BV421         | RPA-T4       | BD Biosciences, San Jose, CA |
| HLA-DR BB515      | G46-6        | BD Biosciences, San Jose, CA |
| CD25 PE           | MA251        | BD Biosciences, San Jose, CA |
| CD69 FITC         | FN50         | BD Biosciences, San Jose, CA |
| TIM-3 PE          | 7D3          | BD Biosciences, San Jose, CA |
| PD-1 BV786        | EH12.1       | BD Biosciences, San Jose, CA |
| TIGIT PerCP eF710 | MBSA43       | eBioscience, San Diego, CA   |

## A. Activation

Unstimulated

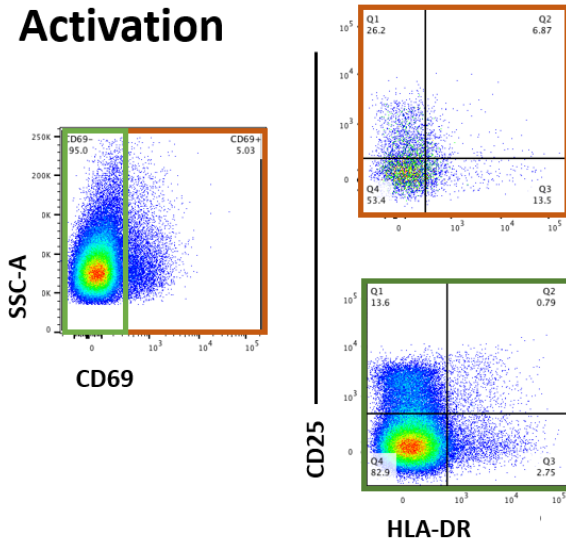

## B. Exhaustion

SSC-A

PD-1

SSC-A

PD-1

TIM-3

TIGIT

TIM-3

TIGIT

Stimulated

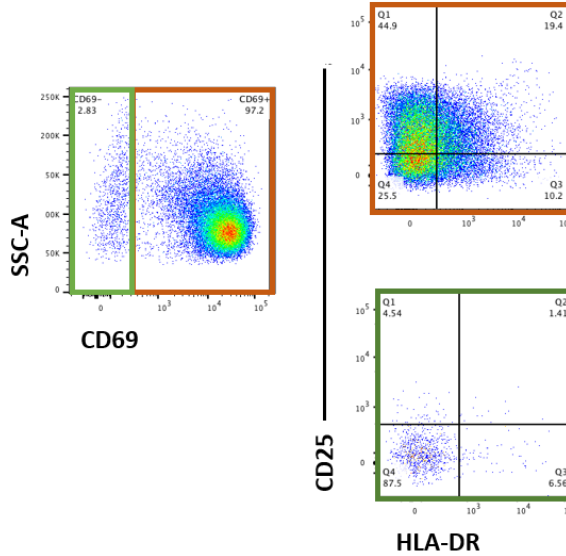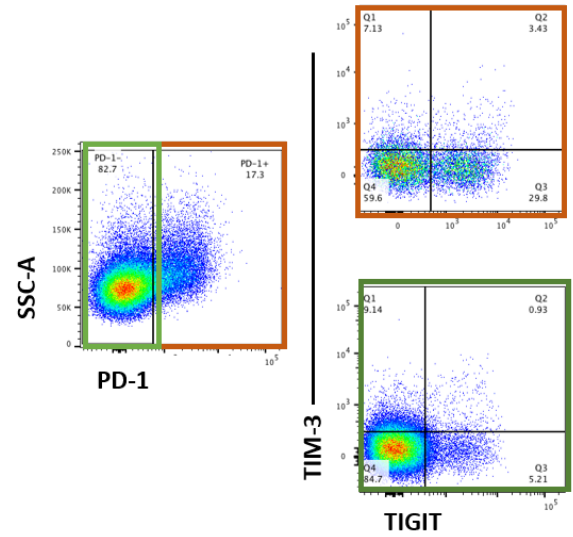

Supplemental Figure 1. Gating strategy for flow cytometry experiments. Cells were gated on lymphocyte, singlet, live CD3+CD8-/CD14-/CD19- and then gated for activation and exhaustion markers as above.
